# Supplementary material for: Enhancing ambipolar carrier transport of black phosphorus field-effect transistors with Ni–P alloy contacts
Source: Royal Society of Chemistry journal article supplement (doi:10.1039/c8cp02285b), 2018-01-01
Supplement: c8cp02285b1.pdf [file c8cp02285b1.pdf]

## Supporting information

### Enhancing ambipolar carrier transport of black phosphorus field-effect transistors with Ni-P alloy contacts

Hyunik Park and Jihyun Kim

Department of Chemical and Biological Engineering, Korea University, Seoul 02841,  
South Korea

Corresponding author: Jihyun Kim ([hyunhyun7@korea.ac.kr](mailto:hyunhyun7@korea.ac.kr))

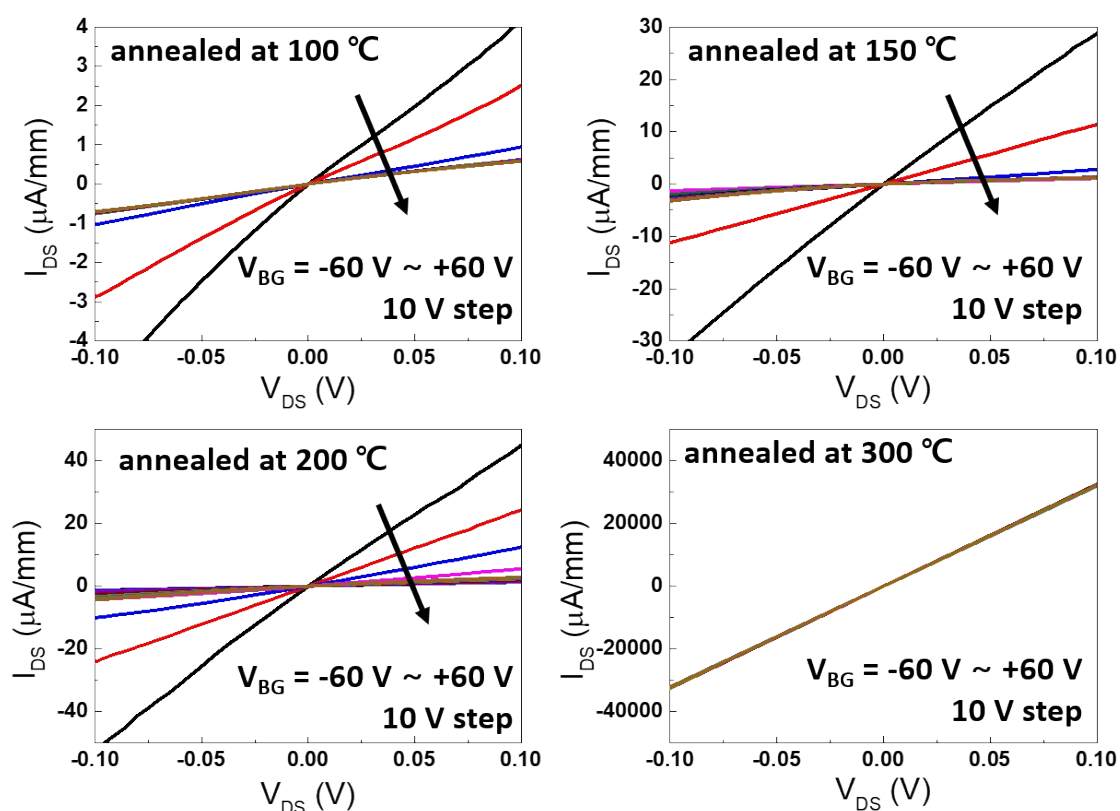

Figure S1 Output characteristics of BP FET after low-vacuum annealing at 100, 150, 200, and 300 °C.

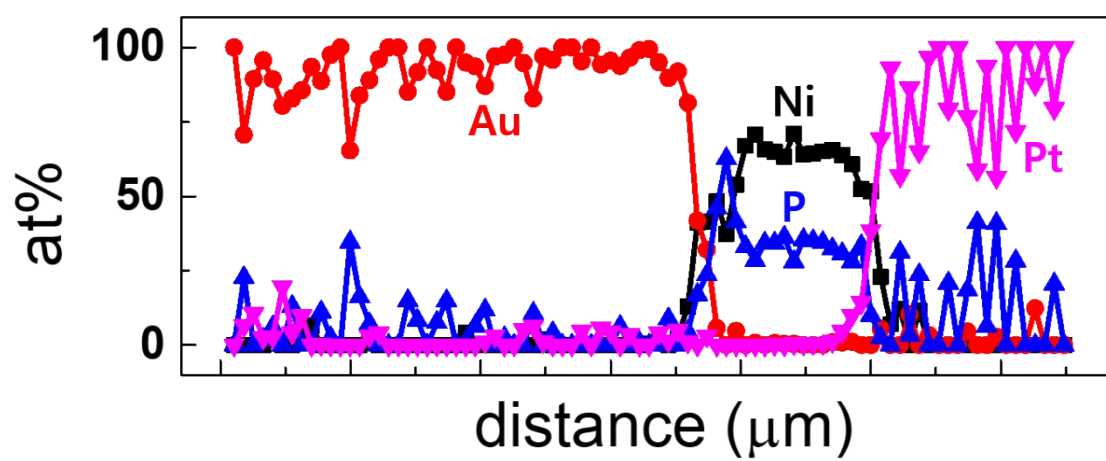

Figure S2 EDX atomic composition along the yellow line in Fig. 3(e)
